# Supplementary material for: The impact of different geometrical restrictions on the nonadiabatic photoisomerization of biliverdin chromophores
Source: Royal Society of Chemistry journal article supplement (doi:10.1039/d2cp02941c), 2022-01-01
Supplement: d2cp02941c1.pdf [file d2cp02941c1.pdf]

## **Supporting Information**

**For**

### **The Impact of the Different Geometrical Restrictions on the Nonadiabatic Photoisomerization of Biliverdin Chromophore**

Yuan Fang<sup>1,2</sup>, Haiyi Huang<sup>1,2</sup>, Kunni Lin<sup>1,2</sup>, Chao Xu<sup>2,3\*</sup>, Feng Long Gu<sup>2,3\*</sup>, Zhenggang Lan<sup>2,3\*</sup>

<sup>1</sup>School of Chemistry, South China Normal University, Guangzhou 510006, China.

<sup>2</sup>MOE Key Laboratory of Environmental Theoretical Chemistry, South China Normal University, Guangzhou 510006, P. R. China.

<sup>3</sup>SCNU Environmental Research Institute, Guangdong Provincial Key Laboratory of Chemical Pollution and Environmental Safety, School of Environment, South China Normal University, Guangzhou 510006, P. R. China.

Email: 2020022489@m.scnu.edu.cn, zhenggang.lan@m.scnu.edu.cn

## 1. Bond lengths of key structures

**Table S1.** Bond lengths (Å) of BV in different optimized geometries.

| Geometries         | C <sub>4</sub> C <sub>5</sub> | C <sub>5</sub> C <sub>6</sub> | C <sub>9</sub> C <sub>10</sub> | C <sub>10</sub> C <sub>11</sub> | C <sub>14</sub> C <sub>15</sub> | C <sub>15</sub> C <sub>16</sub> |
|--------------------|-------------------------------|-------------------------------|--------------------------------|---------------------------------|---------------------------------|---------------------------------|
| S <sub>0_min</sub> | 1.364                         | 1.446                         | 1.404                          | 1.389                           | 1.441                           | 1.364                           |
| S <sub>1_min</sub> | 1.373                         | 1.435                         | 1.380                          | 1.456                           | 1.402                           | 1.396                           |
| CI <sub>1</sub>    | 1.373                         | 1.432                         | 1.378                          | 1.456                           | 1.401                           | 1.396                           |
| CI <sub>2</sub>    | 1.394                         | 1.402                         | 1.449                          | 1.379                           | 1.439                           | 1.367                           |
| CI <sub>3</sub>    | 1.364                         | 1.453                         | 1.438                          | 1.366                           | 1.378                           | 1.427                           |
| CI <sub>4</sub>    | 1.446                         | 1.378                         | 1.380                          | 1.416                           | 1.443                           | 1.366                           |

## 2. Dihedral angles of key structures

**Table S2.** Dihedral angles (degree) of BV in different optimized geometries

| Geometries         | N <sub>A</sub> C <sub>4</sub> C <sub>5</sub> C <sub>6</sub> | C <sub>4</sub> C <sub>5</sub> C <sub>6</sub> N <sub>B</sub> | N <sub>B</sub> C <sub>9</sub> C <sub>10</sub> C <sub>1</sub> | C <sub>9</sub> C <sub>10</sub> C <sub>11</sub> N |        | N <sub>C</sub> C <sub>14</sub> C <sub>15</sub> C <sub>16</sub> | C <sub>14</sub> C <sub>15</sub> C <sub>16</sub> N <sub>B</sub> |
|--------------------|-------------------------------------------------------------|-------------------------------------------------------------|--------------------------------------------------------------|--------------------------------------------------|--------|----------------------------------------------------------------|----------------------------------------------------------------|
|                    |                                                             |                                                             |                                                              | 1                                                | c      |                                                                |                                                                |
| S <sub>0_min</sub> | 5.3                                                         | 28.2                                                        | -16.5                                                        | -12.4                                            | -144.2 | 6.4                                                            |                                                                |
| S <sub>1_min</sub> | 5.4                                                         | 27.0                                                        | 7.6                                                          | -85.2                                            | -163.8 | 18.9                                                           |                                                                |
| CI <sub>1</sub>    | 5.4                                                         | 24.4                                                        | 7.8                                                          | -85.4                                            | -164.5 | 19.0                                                           |                                                                |
| CI <sub>2</sub>    | 12.1                                                        | 17.6                                                        | -93.4                                                        | 1.8                                              | -143.0 | 7.6                                                            |                                                                |
| CI <sub>3</sub>    | 2.6                                                         | 35.1                                                        | -24.8                                                        | -2.7                                             | 177.0  | 95.0                                                           |                                                                |
| CI <sub>4</sub>    | 89.6                                                        | -4.2                                                        | -8.4                                                         | -20.1                                            | -141.2 | 6.3                                                            |                                                                |

### 3. Excitation energy at different levels

**Table S3.** Excitation energy at different levels.

|                                      | OM2/MRCI<br>(16, 12)                                                               | SA(2)-<br>CASSCF<br>(6,6)                                                          | MS-<br>CASPT2<br>(6,6)                                                             | TDDFT/<br>B3LYP                                                                     | TDDFT/<br>M06-2X                                                                     |
|--------------------------------------|------------------------------------------------------------------------------------|------------------------------------------------------------------------------------|------------------------------------------------------------------------------------|-------------------------------------------------------------------------------------|--------------------------------------------------------------------------------------|
| Vertical<br>Excited<br>Energy/<br>eV | 2.31                                                                               | 2.46                                                                               | 2.37                                                                               | 1.96                                                                                | 2.11                                                                                 |
| HOMO                                 | 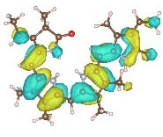  |   |   |   |   |
| LUMO                                 |  |  |  |  |  |

#### 4. The structures of $S_{0\_min}$ , $S_{1\_min}$ and $CI_{5/6}$

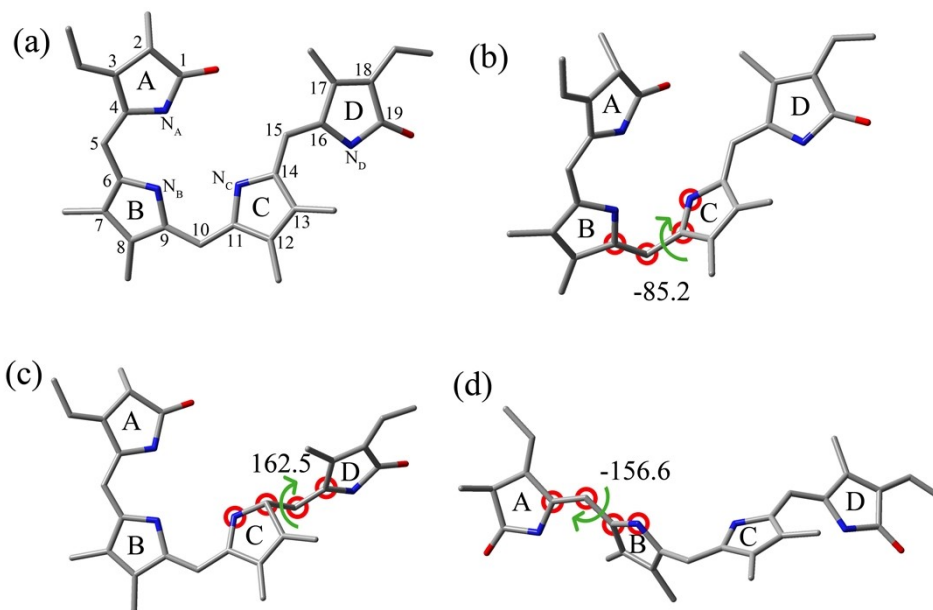

**Figure S1.** The structure of  $S_{0/1\_min}$  and  $CI_{5/6}$  and their major rotating dihedral angles

(marked by red circles) (a)  $S_{0\_min}$ ; (b)  $S_{1\_min}$ ; (c)  $CI_5$ ; (d)  $CI_6$ .

## 5. PE curves of CI<sub>5/6</sub>

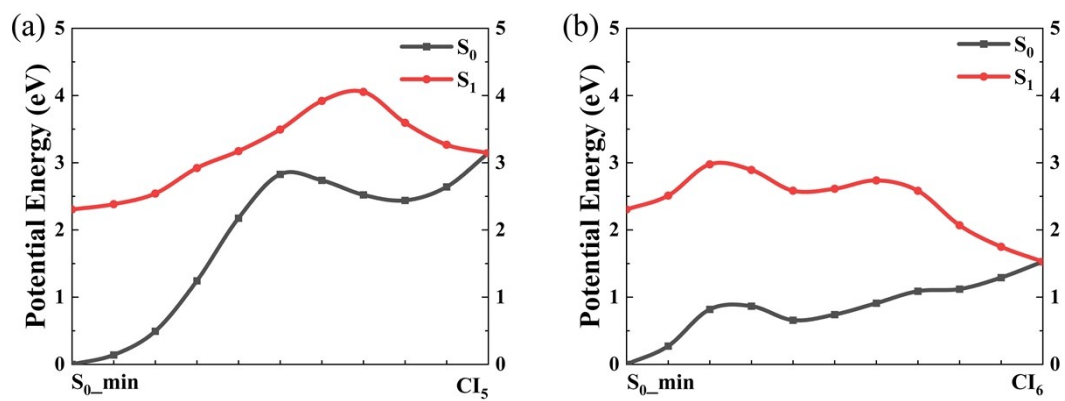

**Figure S2.** Potential energy curves along the linear interpolated pathways from S<sub>0\_min</sub> to the two conical intersections (a) CI<sub>5</sub>, (b) CI<sub>6</sub>.

## 6. The time evolution of the normal vector

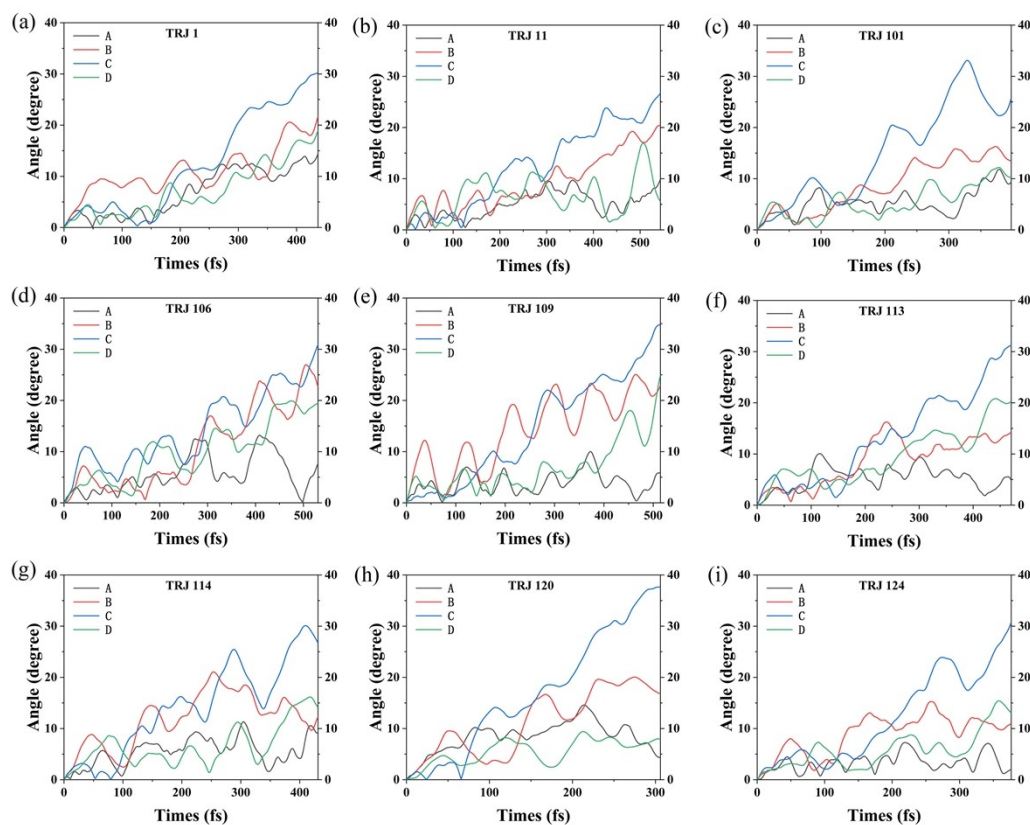

**Figure S3.** The time evolution of the normal vector of the four rings in the typical trajectories of **Model 0** through the  $CI_1$  channel. In order to analyze the contributions of the ring motions to photoisomerization in detail, we employed the method proposed by Böckmann et al. (*J. Phys. Chem. A*, 2010, **114**, 745-754) to describe the torsional motions of the A, B, C, D rings by examining their normal vectors perpendicular to the ring planes. The torsional motion of the ring plane is characterized by the angle between the normal vector and its corresponding initial one. Figure S3 shows the time evolution of these angles along several typical trajectories in the TSH dynamics of the original BV. Here, in the  $C_{10}C_{11}$  isomerization channel, the twisting motion of Ring C contributes play the dominant role and the motion of Ring B is also present, while the motions of Rings A and D give very minor contributions.

## 7. Distributions of key dihedral angles at the initial, hopping and CI geometries

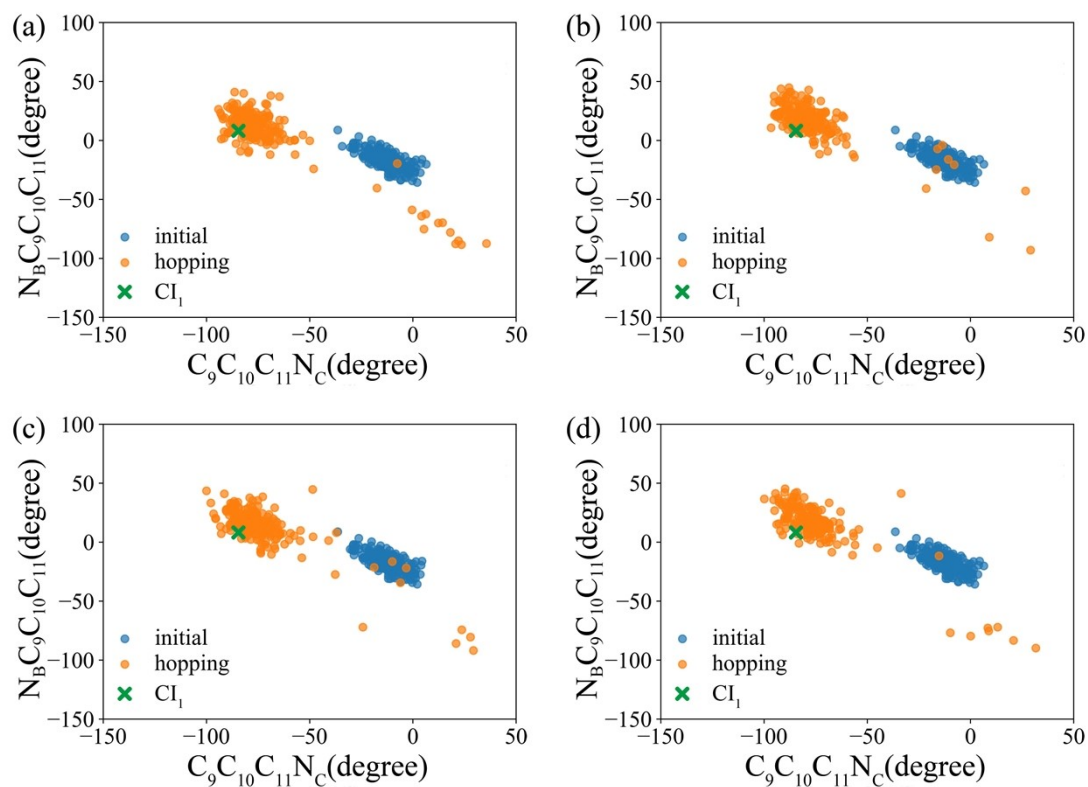

**Figure S4.** Distributions of key dihedral angles at the initial, hopping and CI geometries

of the four models (a) **Model 0**; (b) **Model I**; (c) **Model IV**; (d) **Model VIII**.



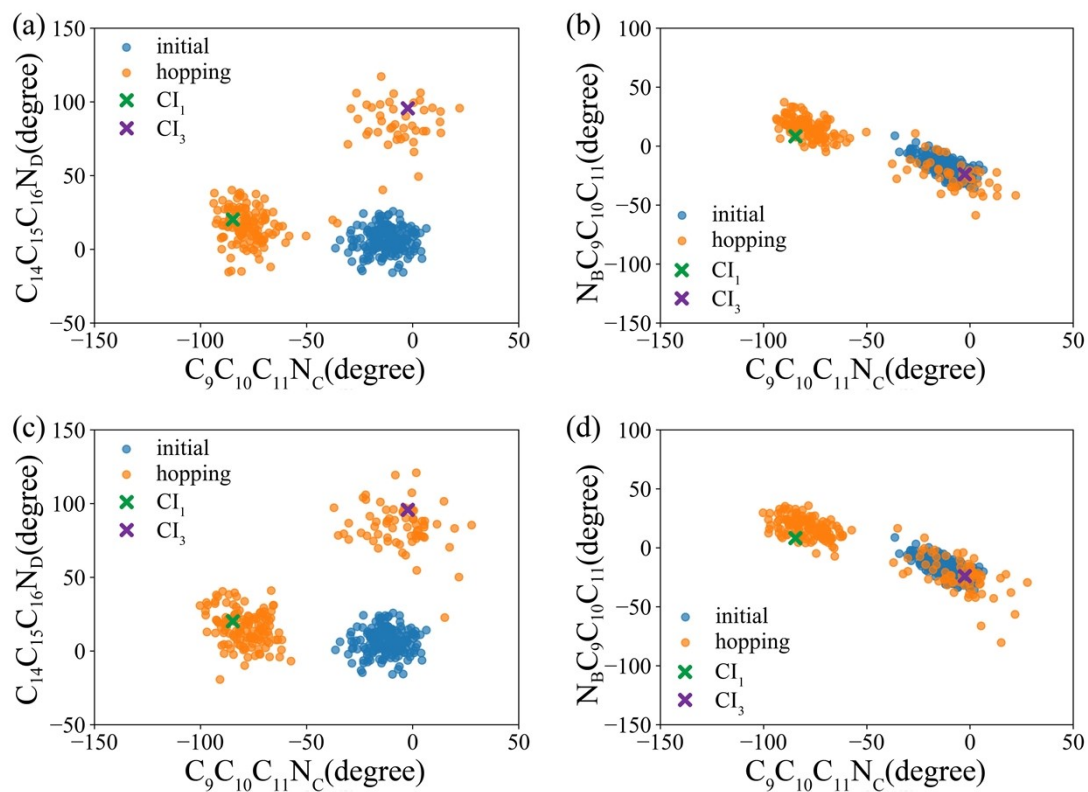

**Figure S5.** Distributions of key dihedral angles at the initial, hopping and CI geometries of the two models (a) and (b) **Model II**; (c) and (d) **Model V**.

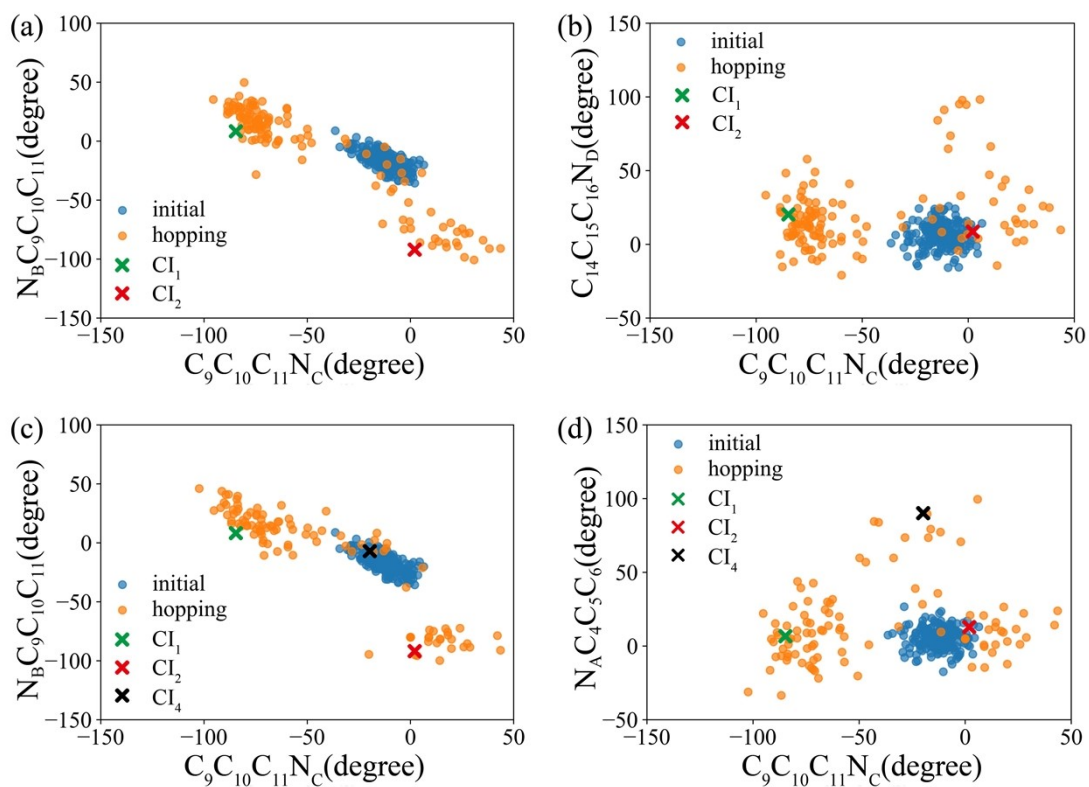

**Figure S6.** Distributions of key dihedral angles at the initial, hopping and CI geometries of the two models (a) and (b) **Model III**; (c) and (d) **Model VII**.

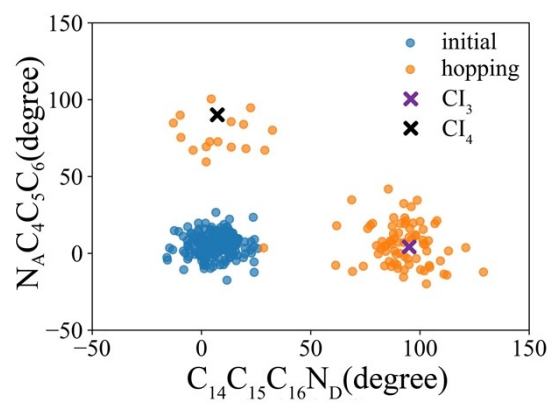

**Figure S7.** Distributions of key dihedral angles at the initial, hopping and CI geometries of **Model VI**.

## 8. Cartesian coordinates

Cartesian coordinates of the  $S_0$  min structure

| Atom | x             | y             | z             |
|------|---------------|---------------|---------------|
| C    | 5.1467488792  | -4.6291439917 | 1.3019979238  |
| C    | 4.8734739420  | -3.2580807716 | 0.8074524817  |
| C    | 3.6430940521  | -2.8197182360 | 0.4822566544  |
| C    | 3.3600317575  | -1.4279154772 | 0.0414261421  |
| N    | 1.9787813138  | -1.3109432220 | -0.1626169090 |
| C    | 1.3133530873  | -2.5136423506 | 0.1336226871  |
| O    | 0.0851184968  | -2.5861617519 | 0.0542093217  |
| C    | 2.3385163402  | -3.5782849668 | 0.5508307556  |
| C    | 2.2573067625  | -4.7095595936 | -0.4562868804 |
| C    | 4.2381783217  | -0.3903923970 | -0.0739729537 |
| C    | 3.7626655788  | 0.9540979530  | -0.3140627796 |
| N    | 2.5225198432  | 1.3726455996  | 0.1102530295  |
| C    | 2.3690363957  | 2.7390333392  | -0.1847177413 |
| C    | 3.5688350702  | 3.1651358118  | -0.8511399083 |
| C    | 3.7985989569  | 4.5161479512  | -1.4033406063 |
| C    | 4.4234240190  | 2.0480845533  | -0.9505440660 |
| C    | 5.7537674455  | 1.9878395350  | -1.5940104658 |
| C    | 1.2070531134  | 3.4736792191  | 0.1025063929  |
| C    | -0.0127410852 | 2.8771528350  | 0.3953260421  |
| C    | -1.2013564769 | 3.4724204693  | 0.9758243463  |
| C    | -1.3332924684 | 4.8793518792  | 1.4063831160  |
| C    | -2.1659613526 | 2.4676518486  | 1.1152556643  |
| C    | -3.4778170912 | 2.6103881834  | 1.7854110698  |
| C    | -1.6036544173 | 1.2567007633  | 0.5707074521  |
| N    | -0.3114484278 | 1.5118159635  | 0.2046152342  |
| C    | -2.1343995487 | -0.0748830777 | 0.4222730216  |
| C    | -3.4264150156 | -0.3306017972 | 0.0674002984  |
| C    | -4.0246043061 | -1.7004257351 | -0.0663556290 |
| C    | -3.2823677610 | -2.9231839718 | 0.3063369579  |
| C    | -5.2997564307 | -1.5681460948 | -0.5329324578 |
| C    | -6.2798174224 | -2.5962919266 | -0.8187496089 |
| C    | -7.5043114917 | -2.2874588809 | -1.2632700137 |
| C    | -5.5679134168 | -0.0944874711 | -0.7306854589 |
| O    | -6.5608945895 | 0.4957050280  | -1.1470258336 |
| N    | -4.3923777251 | 0.5837384143  | -0.3233342373 |
| H    | 5.5644329420  | -5.2271520860 | 0.4782562656  |
| H    | 5.7472233781  | -2.5991519004 | 0.7026111842  |
| H    | 1.5905532973  | -0.6348356641 | -0.8069080490 |
| H    | 2.5369433434  | -4.3554915517 | -1.4576560451 |
| H    | 2.9440484761  | -5.5143310434 | -0.1648943186 |

---

|   |               |               |               |
|---|---------------|---------------|---------------|
| H | 1.2348952825  | -5.1057016156 | -0.4861644659 |
| H | 5.3110669980  | -0.5364322269 | 0.0039028693  |
| H | 2.0152478772  | 0.9118202681  | 0.8598504646  |
| H | 4.8760741750  | 4.7299367345  | -1.4235417795 |
| H | 3.2923270743  | 5.2786590618  | -0.7920807866 |
| H | 5.6424897798  | 1.6712720334  | -2.6433726883 |
| H | 6.4005575090  | 1.2674198723  | -1.0696301009 |
| H | 6.2293828529  | 2.9800512542  | -1.5686100444 |
| H | 1.2691187477  | 4.5710756942  | 0.0871688740  |
| H | -0.4495371451 | 5.4700233333  | 1.1245858358  |
| H | -1.4551974827 | 4.9137567648  | 2.4989690977  |
| H | -4.1888395742 | 3.1404538295  | 1.1286938880  |
| H | -3.3506144969 | 3.2023214864  | 2.7057320690  |
| H | -3.8855375967 | 1.6274834270  | 2.0523649483  |
| H | 0.2338133571  | 0.8851554690  | -0.3744593898 |
| H | -1.4485942814 | -0.9038383510 | 0.5801555186  |
| H | -3.2550559687 | -3.0060855694 | 1.4043545515  |
| H | -2.2547161701 | -2.8852081716 | -0.0759907944 |
| H | -3.7888281585 | -3.8080342557 | -0.1047530828 |
| H | -5.9599422189 | -3.6310090236 | -0.6499625378 |
| H | -7.8207987243 | -1.2681500139 | -1.4293111281 |
| H | -8.2309176341 | -3.0647942576 | -1.4749964449 |
| H | -4.2535253138 | 1.5764630970  | -0.4117005242 |
| H | 4.2356869469  | -5.1178629342 | 1.6755724605  |
| H | 2.1158842648  | -3.9317764534 | 1.5880542404  |
| H | 5.8846058597  | -4.5844296430 | 2.1152388483  |
| H | 3.4082777290  | 4.5605740642  | -2.4310173748 |
| H | -2.2242958429 | 5.3187630712  | 0.9369896566  |

---

Cartesian coordinates of the S<sub>1</sub> min structure

| Atom | x             | y             | z             |
|------|---------------|---------------|---------------|
| C    | 4.3738320351  | -4.5264919901 | 1.8918987022  |
| C    | 4.3282512681  | -3.1395963422 | 1.3675845340  |
| C    | 3.2873416400  | -2.6524709258 | 0.6640076763  |
| C    | 3.2044978841  | -1.2536094174 | 0.1846245275  |
| N    | 1.9451604919  | -1.0808864043 | -0.4092231598 |
| C    | 1.1967476305  | -2.2573804978 | -0.3902760955 |
| O    | 0.0582742518  | -2.2904052906 | -0.8749723415 |
| C    | 2.0137330129  | -3.3694789496 | 0.2807633233  |
| C    | 2.2408229379  | -4.4600366814 | -0.7502251881 |
| C    | 4.1454569992  | -0.2600027648 | 0.2974331560  |
| C    | 3.8349711942  | 1.0828393213  | -0.1005667097 |
| N    | 2.5306565218  | 1.5666364854  | -0.0780693672 |
| C    | 2.5032501576  | 2.8535953131  | -0.6389680106 |
| C    | 3.8727858794  | 3.1895096107  | -1.0043115007 |
| C    | 4.2589161235  | 4.4621799796  | -1.6454421821 |
| C    | 4.6807813746  | 2.0984484530  | -0.6597608654 |
| C    | 6.1382714697  | 1.9460364333  | -0.8649009871 |
| C    | 1.3117636396  | 3.4852770995  | -0.9331366237 |
| C    | 0.1131876741  | 2.8039380834  | -0.4663423024 |
| C    | -0.5280433696 | 2.8741667120  | 0.8215824083  |
| C    | -0.1509207261 | 3.8295949140  | 1.8864973906  |
| C    | -1.5595805326 | 1.9289126318  | 0.8383720105  |
| C    | -2.4031778289 | 1.6105949579  | 2.0094368362  |
| C    | -1.5201784240 | 1.2198880717  | -0.4366917448 |
| N    | -0.4961185566 | 1.8133439403  | -1.1899130879 |
| C    | -2.1119578438 | 0.0351314205  | -0.8975234691 |
| C    | -3.3242730212 | -0.4953489123 | -0.4528010182 |
| C    | -3.7743601477 | -1.8845507783 | -0.7301787009 |
| C    | -2.9308318651 | -2.8736696088 | -1.4334930634 |
| C    | -5.0373122779 | -2.0379919083 | -0.2034803175 |
| C    | -5.8864553973 | -3.1988504179 | -0.1891604047 |
| C    | -7.1208964755 | -3.1571996874 | 0.3382630208  |
| C    | -5.4381962038 | -0.7149251319 | 0.3997142607  |
| O    | -6.4623546891 | -0.3406403682 | 0.9555921745  |
| N    | -4.3211140243 | 0.1629443797  | 0.2153389098  |
| H    | 4.9978431083  | -5.1392362742 | 1.2237502323  |
| H    | 5.2086855362  | -2.5147638966 | 1.5690143313  |
| H    | 1.7298778120  | -0.3045315155 | -1.0167360576 |
| H    | 2.8236871098  | -4.0721815416 | -1.5966788681 |
| H    | 2.7950300139  | -5.2900427759 | -0.2946107920 |
| H    | 1.2753214412  | -4.8297571663 | -1.1180135120 |

---

|   |               |               |               |
|---|---------------|---------------|---------------|
| H | 5.1507716927  | -0.4726240327 | 0.6534989298  |
| H | 1.8338034377  | 1.2359568751  | 0.5783859573  |
| H | 5.3541646259  | 4.5428203893  | -1.6979818736 |
| H | 3.8637809796  | 5.3105100288  | -1.0653211219 |
| H | 6.3244865161  | 1.2152902564  | -1.6673738860 |
| H | 6.6131214941  | 1.5910031155  | 0.0630005122  |
| H | 6.5847794830  | 2.9104443274  | -1.1482710975 |
| H | 1.2419108541  | 4.4303854078  | -1.4452054723 |
| H | 0.8570157814  | 4.2219607625  | 1.7018466987  |
| H | -0.1741109539 | 3.3287343480  | 2.8667660237  |
| H | -3.3482038070 | 2.1759196585  | 1.9574261064  |
| H | -1.8775288520 | 1.9124596738  | 2.9272577301  |
| H | -2.6110638900 | 0.5342410005  | 2.0621776027  |
| H | -0.2614670262 | 1.5695509401  | -2.1448653825 |
| H | -1.5629638905 | -0.5479509499 | -1.6413523426 |
| H | -3.3235953756 | -3.8853713936 | -1.2577317031 |
| H | -1.8950872299 | -2.8217796343 | -1.0849888933 |
| H | -2.9627917700 | -2.6685443411 | -2.5160899653 |
| H | -5.4715903136 | -4.1101313594 | -0.6318724853 |
| H | -7.5396277631 | -2.2621769675 | 0.7757154807  |
| H | -7.7514759590 | -4.0394360898 | 0.3386321410  |
| H | -4.3234898302 | 1.1416990911  | 0.4576681452  |
| H | 3.3697972397  | -4.9712882133 | 1.9545574481  |
| H | 1.4690147325  | -3.7582722407 | 1.1771688741  |
| H | 4.8241874514  | -4.5257849794 | 2.8946946781  |
| H | 3.8482934930  | 4.5034453758  | -2.6674490824 |
| H | -0.8674203284 | 4.6638933985  | 1.8952322509  |

---

Cartesian coordinates of the Cl<sub>1</sub> structure

| Atom | x             | y             | z             |
|------|---------------|---------------|---------------|
| C    | 4.2902145792  | -4.3543459095 | 2.2479704314  |
| C    | 4.2106903318  | -3.0165921650 | 1.6118928403  |
| C    | 3.1518928669  | -2.6003423206 | 0.8904816003  |
| C    | 3.0405518330  | -1.2501969623 | 0.2937957061  |
| N    | 1.7674645053  | -1.1453899867 | -0.2892992508 |
| C    | 1.0410088345  | -2.3242588242 | -0.1627261575 |
| O    | -0.1027663063 | -2.4274262038 | -0.6258594796 |
| C    | 1.8800717130  | -3.3642068799 | 0.5972600176  |
| C    | 2.1037578540  | -4.5453529231 | -0.3266100549 |
| C    | 3.9747918399  | -0.2434753780 | 0.2977237744  |
| C    | 3.6562356955  | 1.0560461702  | -0.2115075579 |
| N    | 2.3418726570  | 1.5236094017  | -0.2592897136 |
| C    | 2.3234235336  | 2.7722560881  | -0.9053595651 |
| C    | 3.6962997596  | 3.0896284774  | -1.2701900090 |
| C    | 4.0908340620  | 4.3095371981  | -2.0020761072 |
| C    | 4.5043284374  | 2.0338390875  | -0.8258741454 |
| C    | 5.9663586630  | 1.8829700524  | -0.9989218213 |
| C    | 1.1397028594  | 3.3853622999  | -1.2539325360 |
| C    | -0.0669178926 | 2.7424476143  | -0.7521243805 |
| C    | -0.7158799932 | 2.9086703018  | 0.5332524384  |
| C    | -0.3328747328 | 3.9408752424  | 1.5218620613  |
| C    | -1.7451097412 | 1.9730555956  | 0.6166252599  |
| C    | -2.5948460929 | 1.7435013968  | 1.8063017967  |
| C    | -1.7068028347 | 1.1759376459  | -0.6021685826 |
| N    | -0.6772652019 | 1.7147716621  | -1.4026196815 |
| C    | -2.2956927937 | -0.0383933510 | -0.9775398429 |
| C    | -3.5010790083 | -0.5446751017 | -0.4877079494 |
| C    | -3.9388533360 | -1.9538590471 | -0.6612643975 |
| C    | -3.0817761924 | -2.9858837214 | -1.2808583808 |
| C    | -5.2021766613 | -2.0783453686 | -0.1247344396 |
| C    | -6.0427724950 | -3.2384999664 | -0.0235647589 |
| C    | -7.2734202907 | -3.1695551540 | 0.5117999163  |
| C    | -5.6107881077 | -0.7161922053 | 0.3838996022  |
| O    | -6.6360184259 | -0.3103025716 | 0.9135254003  |
| N    | -4.4968857954 | 0.1528519233  | 0.1418859225  |
| H    | 4.9135003920  | -5.0103961893 | 1.6215504161  |
| H    | 5.0841701663  | -2.3640358557 | 1.7459062960  |
| H    | 1.5322457236  | -0.4276079880 | -0.9587799563 |
| H    | 2.6760198630  | -4.2370021286 | -1.2119234546 |
| H    | 2.6665862640  | -5.3269397472 | 0.1995995392  |
| H    | 1.1368999592  | -4.9545037555 | -0.6468706259 |



---

|   |               |               |               |
|---|---------------|---------------|---------------|
| H | 4.9872683414  | -0.4209496390 | 0.6562129525  |
| H | 1.6615769018  | 1.2743528398  | 0.4506346279  |
| H | 3.7897622557  | 4.2215415337  | -3.0589099942 |
| H | 5.1813473018  | 4.4435511027  | -1.9527685120 |
| H | 6.4217788283  | 2.8554150494  | -1.2379942246 |
| H | 6.1695153136  | 1.1804505438  | -1.8224082150 |
| H | 6.4184509815  | 1.4935029327  | -0.0734694822 |
| H | 1.0772016827  | 4.2977720701  | -1.8210259528 |
| H | -1.0403267444 | 4.7803922131  | 1.4622136240  |
| H | 0.6797159745  | 4.3068515382  | 1.3107666045  |
| H | -3.5437536762 | 2.2951115634  | 1.7040632324  |
| H | -2.0756037332 | 2.1226928313  | 2.6987706689  |
| H | -2.7927997988 | 0.6729929437  | 1.9461163625  |
| H | -0.4416229092 | 1.3992991880  | -2.3355132980 |
| H | -1.7505211590 | -0.6687303813 | -1.6853983113 |
| H | -3.4907741068 | -3.9834296470 | -1.0664401744 |
| H | -2.0593248910 | -2.9243203219 | -0.8958476529 |
| H | -3.0711955479 | -2.8393144922 | -2.3736441394 |
| H | -5.6268714691 | -4.1752912482 | -0.4075364416 |
| H | -7.6955574224 | -2.2501233807 | 0.8918316549  |
| H | -7.8965048961 | -4.0544352681 | 0.5782562801  |
| H | -4.5147707184 | 1.1506142166  | 0.2909854894  |
| H | 3.2953154827  | -4.8086980499 | 2.3659542334  |
| H | 1.3494819017  | -3.6685728693 | 1.5340032886  |
| H | 4.7573623567  | -4.2630530430 | 3.2388756767  |
| H | 3.6003580805  | 5.1914071494  | -1.5613005677 |
| H | -0.3643415837 | 3.5179922993  | 2.5377970976  |

---

Cartesian coordinates of the Cl<sub>2</sub> structure

| Atom | x             | y             | z             |
|------|---------------|---------------|---------------|
| C    | 7.9444701763  | -3.8131995901 | 0.8684492548  |
| C    | 6.8243569443  | -2.9063165932 | 0.5320494545  |
| C    | 5.6018438121  | -2.9883066797 | 1.1148620587  |
| C    | 4.4905912562  | -2.0591407038 | 0.8246744944  |
| N    | 3.4378561057  | -2.3552814239 | 1.6578258224  |
| C    | 3.7321903815  | -3.4645923979 | 2.4948174333  |
| O    | 2.9125458929  | -3.8866248210 | 3.2949970414  |
| C    | 5.1513413246  | -3.9652091566 | 2.1738901675  |
| C    | 5.0270730346  | -5.3841376090 | 1.6587827856  |
| C    | 4.4999667470  | -1.0657342039 | -0.1532842299 |
| C    | 3.5326812268  | -0.0594497998 | -0.2807167493 |
| N    | 2.6128643123  | 0.3438621799  | 0.7034800581  |
| C    | 1.9038911737  | 1.4259305117  | 0.2433226675  |
| C    | 2.3142762381  | 1.7020748057  | -1.1226276626 |
| C    | 1.7276388058  | 2.7657834235  | -1.9653274897 |
| C    | 3.3352001527  | 0.8130654234  | -1.4367681202 |
| C    | 4.0675327444  | 0.6909868602  | -2.7144181134 |
| C    | 0.9800955554  | 2.1660143914  | 1.0787968287  |
| C    | -0.3649872428 | 1.8659826074  | 1.1109185603  |
| C    | -1.4010320628 | 2.5041450522  | 1.9081287594  |
| C    | -1.1742239653 | 3.6251838454  | 2.8412607603  |
| C    | -2.6179927800 | 1.8721515273  | 1.6068428027  |
| C    | -3.9191651316 | 2.1444346544  | 2.2594553922  |
| C    | -2.3489531664 | 0.8532306929  | 0.6402665486  |
| N    | -0.9790344893 | 0.8295979677  | 0.4015758236  |
| C    | -3.2192142811 | -0.1075917308 | 0.0155079152  |
| C    | -4.4748655099 | 0.2066344038  | -0.4236762301 |
| C    | -5.4650218576 | -0.7403656685 | -1.0014307366 |
| C    | -5.2213534471 | -2.1963960171 | -1.0793899221 |
| C    | -6.5709142098 | -0.0308394592 | -1.3908193890 |
| C    | -7.7955898994 | -0.5092137880 | -1.9939384261 |
| C    | -8.7835062312 | 0.3338723363  | -2.3186351120 |
| C    | -6.3102242950 | 1.4216128869  | -1.0823875796 |
| O    | -7.0089516909 | 2.4161793750  | -1.2834661988 |
| N    | -5.0409332792 | 1.4790050819  | -0.4790283518 |
| H    | 8.0693129804  | -4.5361356790 | 0.0493988285  |
| H    | 7.0307046958  | -2.1421822947 | -0.2325306499 |
| H    | 2.5115187601  | -1.9587757639 | 1.5889447355  |
| H    | 4.4481991030  | -5.4109647104 | 0.7261533974  |
| H    | 6.0255886411  | -5.7926872724 | 1.4626197705  |
| H    | 4.5291786551  | -6.0072367025 | 2.4100310802  |

---

|   |               |               |               |
|---|---------------|---------------|---------------|
| H | 5.3130299750  | -1.0629651261 | -0.8822754116 |
| H | 2.6535684994  | 0.0906503746  | 1.6844613652  |
| H | 1.1431222135  | 2.3105546729  | -2.7794848850 |
| H | 2.5308926340  | 3.3777078128  | -2.4024219409 |
| H | 3.5693713277  | -0.0560028575 | -3.3499252126 |
| H | 5.1087391369  | 0.3792931458  | -2.5395261140 |
| H | 4.0664588927  | 1.6586806724  | -3.2327378892 |
| H | 1.3770923103  | 3.0142666144  | 1.6191980510  |
| H | -0.1693115968 | 3.5630913749  | 3.2883229683  |
| H | -1.9258497135 | 3.5999832103  | 3.6445738118  |
| H | -4.3823240912 | 3.0475678664  | 1.8270555319  |
| H | -3.7549454727 | 2.3215948863  | 3.3351345467  |
| H | -4.5993193265 | 1.2912730462  | 2.1387254255  |
| H | -0.5419109155 | 0.2999204727  | -0.3373130342 |
| H | -2.8393207872 | -1.1242106821 | -0.1039814903 |
| H | -5.0773524797 | -2.6021785037 | -0.0664842132 |
| H | -4.3193924697 | -2.3926985059 | -1.6813996635 |
| H | -6.0783773339 | -2.6995267692 | -1.5477323596 |
| H | -7.8675041929 | -1.5905658579 | -2.1656377369 |
| H | -8.7125147885 | 1.3974767858  | -2.1467019817 |
| H | -9.7002288790 | -0.0299676268 | -2.7716087732 |
| H | -4.5657827549 | 2.3301541958  | -0.2289308616 |
| H | 7.7675276318  | -4.3584654562 | 1.8050572433  |
| H | 5.7760468116  | -3.9037046922 | 3.0935276610  |
| H | 8.8688881755  | -3.2286412248 | 0.9662213688  |
| H | 1.0709432943  | 3.4038040656  | -1.3618024003 |
| H | -1.2669757579 | 4.5802113624  | 2.2978926507  |

---

Cartesian coordinates of the Cl<sub>3</sub> structure

| Atom | x             | y             | z             |
|------|---------------|---------------|---------------|
| C    | 4.6743756851  | -4.8367120925 | 1.0245380486  |
| C    | 4.5628934142  | -3.4148333321 | 0.6217952674  |
| C    | 3.4106944725  | -2.8488012600 | 0.2048794014  |
| C    | 3.2777027899  | -1.4141005562 | -0.1360102280 |
| N    | 1.9350740487  | -1.2014706409 | -0.5193186820 |
| C    | 1.1617553851  | -2.3316965454 | -0.3652701166 |
| O    | -0.0656540597 | -2.3092130639 | -0.5630094231 |
| C    | 2.0566761442  | -3.5052472372 | 0.0685182498  |
| C    | 2.0123743418  | -4.5456953321 | -1.0345121421 |
| C    | 4.1901202133  | -0.4078705446 | -0.0152380634 |
| C    | 3.7929630511  | 0.9736861953  | -0.2281976956 |
| N    | 2.5323279797  | 1.4190768975  | 0.1483120553  |
| C    | 2.4030434039  | 2.7708239670  | -0.1765321923 |
| C    | 3.6075374102  | 3.1827030025  | -0.7928753159 |
| C    | 3.8885090970  | 4.5240513138  | -1.3474983927 |
| C    | 4.4770916664  | 2.0481625627  | -0.8314646207 |
| C    | 5.8310141498  | 1.9976355783  | -1.4245849006 |
| C    | 1.1766448649  | 3.4888426725  | 0.0444794047  |
| C    | -0.0200112399 | 2.8311841733  | 0.0937838235  |
| C    | -1.3498643990 | 3.3346269778  | 0.4588250932  |
| C    | -1.6081603474 | 4.7479115739  | 0.8151968618  |
| C    | -2.2374847486 | 2.2775882854  | 0.4486567808  |
| C    | -3.6823240154 | 2.2927677735  | 0.7549035842  |
| C    | -1.4977656198 | 1.0762590522  | 0.0368360621  |
| N    | -0.1602096106 | 1.4285403463  | -0.1190570932 |
| C    | -1.9117164297 | -0.2232157851 | -0.1609962444 |
| C    | -3.2652455247 | -0.6206441911 | 0.0549818525  |
| C    | -3.8363078235 | -1.1312112109 | 1.3468639630  |
| C    | -3.0274147484 | -1.2078619880 | 2.5786282686  |
| C    | -5.1327263059 | -1.5127088166 | 1.1312788406  |
| C    | -6.1065054399 | -2.0643245113 | 2.0336238127  |
| C    | -7.3433561479 | -2.3914618827 | 1.6258905690  |
| C    | -5.4372062396 | -1.2423020987 | -0.3374880093 |
| O    | -6.4252506566 | -1.3945223756 | -1.0243535347 |
| N    | -4.2027943410 | -0.6901560708 | -0.8990676265 |
| H    | 5.1184815243  | -5.4107797050 | 0.1955756531  |
| H    | 5.4866289588  | -2.8235841308 | 0.6640019055  |
| H    | 1.6221320777  | -0.3515382443 | -0.9583895447 |
| H    | 2.4270480137  | -4.1342075394 | -1.9643292672 |
| H    | 2.6084496083  | -5.4192605921 | -0.7428769882 |
| H    | 0.9752367268  | -4.8597462749 | -1.2092795662 |

---

|   |               |               |               |
|---|---------------|---------------|---------------|
| H | 5.2348788702  | -0.6074340976 | 0.2164595402  |
| H | 1.9674166128  | 0.9671429895  | 0.8564042128  |
| H | 4.9535068556  | 4.7651053318  | -1.2104725082 |
| H | 3.2784878276  | 5.2891670185  | -0.8406347498 |
| H | 5.7524809998  | 1.8371005798  | -2.5124939331 |
| H | 6.4145952888  | 1.1748527709  | -0.9826487132 |
| H | 6.3537616904  | 2.9494596891  | -1.2410350729 |
| H | 1.2268767514  | 4.5765382217  | 0.1377247008  |
| H | -0.9978349720 | 5.0217227428  | 1.6860718724  |
| H | -2.6693359572 | 4.9002893236  | 1.0595915347  |
| H | -4.2621578569 | 2.0610361875  | -0.1544061405 |
| H | -3.9835048601 | 3.2865254411  | 1.1139746970  |
| H | -3.9104333214 | 1.5542731417  | 1.5404791999  |
| H | 0.3656836279  | 1.0122240219  | -0.8842442645 |
| H | -1.2140719767 | -1.0249213676 | -0.4053420295 |
| H | -2.1902403925 | -0.5047881458 | 2.5216197230  |
| H | -2.6324756197 | -2.2292006810 | 2.6792339866  |
| H | -3.6488152044 | -0.9751085241 | 3.4539179059  |
| H | -5.7777830607 | -2.2044771282 | 3.0651738920  |
| H | -7.6843630092 | -2.2633481194 | 0.6067928553  |
| H | -8.0593753624 | -2.8091469649 | 2.3237047454  |
| H | -4.0806734773 | -0.4361555249 | -1.8709075586 |
| H | 3.6930542293  | -5.2682827465 | 1.2740701974  |
| H | 1.6911277506  | -3.9212920523 | 1.0419170184  |
| H | 5.3318229513  | -4.9204534415 | 1.9026264862  |
| H | 3.6560911757  | 4.5350628467  | -2.4248486826 |
| H | -1.3412771351 | 5.3910697992  | -0.0344017543 |

---

Cartesian coordinates of the Cl<sub>4</sub> structure

| Atom | x             | y             | z             |
|------|---------------|---------------|---------------|
| C    | 4.2147674600  | -2.2189845400 | 3.2571964400  |
| C    | 4.1769510100  | -1.7331812200 | 1.8622338600  |
| C    | 3.3627579700  | -2.2661116700 | 0.9122398800  |
| C    | 3.3236027500  | -1.7701618500 | -0.4565130900 |
| N    | 2.3788392900  | -2.4357022000 | -1.1676448200 |
| C    | 1.7111582900  | -3.4028791300 | -0.3475413800 |
| O    | 0.7704816700  | -4.0547716500 | -0.7800341000 |
| C    | 2.3795484100  | -3.4069713700 | 1.0367477800  |
| C    | 3.0583007800  | -4.7500634700 | 1.2240892600  |
| C    | 4.1334484600  | -0.7012826100 | -0.9975986100 |
| C    | 3.6772685900  | 0.5955821200  | -0.9069328000 |
| N    | 2.4286445900  | 0.9533164000  | -0.3943328500 |
| C    | 2.3232947500  | 2.3562095600  | -0.4021435100 |
| C    | 3.5387720600  | 2.8826167000  | -1.0318428400 |
| C    | 3.7638180000  | 4.3251237400  | -1.2854700700 |
| C    | 4.3486665400  | 1.8200605600  | -1.3600402800 |
| C    | 5.6637537900  | 1.8200421800  | -2.0385075800 |
| C    | 1.2438363400  | 3.0763739700  | 0.0669144800  |
| C    | 0.0220453000  | 2.4808940300  | 0.4644168200  |
| C    | -1.0003477700 | 3.0373595900  | 1.3009140600  |
| C    | -0.9460182300 | 4.3421684500  | 1.9938662100  |
| C    | -2.0458749700 | 2.0925241100  | 1.3868238600  |
| C    | -3.2485192800 | 2.2117769800  | 2.2415193400  |
| C    | -1.6802855800 | 0.9818626600  | 0.5684247500  |
| N    | -0.4050388000 | 1.2059777000  | 0.0786916300  |
| C    | -2.3763825200 | -0.2484126900 | 0.2784468600  |
| C    | -3.7156348200 | -0.2873719800 | 0.0134007500  |
| C    | -4.5243728500 | -1.5130737500 | -0.2391684200 |
| C    | -3.9557413600 | -2.8737814700 | -0.1406628500 |
| C    | -5.8057639100 | -1.1332318100 | -0.5396167400 |
| C    | -6.9523050600 | -1.9563289100 | -0.8514928300 |
| C    | -8.1437397000 | -1.4110379500 | -1.1292529200 |
| C    | -5.8541433200 | 0.3750299900  | -0.5007758500 |
| O    | -6.7839609500 | 1.1494424300  | -0.7216249200 |
| N    | -4.5613114500 | 0.8065833300  | -0.1398224000 |
| H    | 3.3565719500  | -2.8615215700 | 3.4945155200  |
| H    | 4.8576932200  | -0.9121459400 | 1.5989238900  |
| H    | 2.1800287600  | -2.2817473600 | -2.1481222100 |
| H    | 3.8432888800  | -4.8958999400 | 0.4706965300  |
| H    | 3.5149006900  | -4.7951054100 | 2.2210116400  |
| H    | 2.3181960000  | -5.5531132900 | 1.1329842800  |

---

|   |               |               |               |
|---|---------------|---------------|---------------|
| H | 5.0943276500  | -0.9429653300 | -1.4326020900 |
| H | 1.9607487600  | 0.3955280000  | 0.3114542800  |
| H | 4.7979309900  | 4.4950147700  | -1.6162017000 |
| H | 3.5859701100  | 4.8991297200  | -0.3647792600 |
| H | 5.5667418600  | 1.3482878900  | -3.0272446500 |
| H | 6.3970925400  | 1.2609935000  | -1.4380132100 |
| H | 6.0219067500  | 2.8507673600  | -2.1689374000 |
| H | 1.3253675000  | 4.1633111000  | 0.1476946400  |
| H | -0.0697836800 | 4.9258805800  | 1.6735121400  |
| H | -0.8883593400 | 4.1760833900  | 3.0806837100  |
| H | -3.9498252700 | 2.9451719700  | 1.8100938900  |
| H | -2.9469123100 | 2.5653326700  | 3.2402129500  |
| H | -3.7510714700 | 1.2415266100  | 2.3447889600  |
| H | -0.0052438000 | 0.6868119000  | -0.6915179500 |
| H | -1.7912782700 | -1.1683533500 | 0.2694262800  |
| H | -3.5958231100 | -3.0516372600 | 0.8845839900  |
| H | -3.1160470700 | -2.9820693800 | -0.8444755100 |
| H | -4.7222528700 | -3.6218786500 | -0.3840465200 |
| H | -6.7914172800 | -3.0410728000 | -0.8468141200 |
| H | -8.3036131700 | -0.3429165100 | -1.1337666300 |
| H | -8.9999943100 | -2.0352875200 | -1.3629434400 |
| H | -4.2707027500 | 1.7696293700  | -0.1029844500 |
| H | 4.2226965300  | -1.3615048400 | 3.9438233300  |
| H | 1.6076762700  | -3.2202150400 | 1.8221504400  |
| H | 5.1423133400  | -2.7914237300 | 3.4028510300  |
| H | 3.0764628700  | 4.6678276400  | -2.0704644300 |
| H | -1.8592565400 | 4.9117118300  | 1.7689144000  |

---

Cartesian coordinates of the Cl<sub>5</sub> structure

| Atom | x             | y             | z             |
|------|---------------|---------------|---------------|
| C    | 6.1805452977  | -4.4592453084 | 1.1308152950  |
| C    | 5.6598217715  | -3.1256677522 | 0.7446208846  |
| C    | 4.4380036830  | -2.9386353060 | 0.2065030587  |
| C    | 3.8857499953  | -1.6061576660 | -0.1363196265 |
| N    | 2.5699752926  | -1.7645970056 | -0.5438619054 |
| C    | 2.2048548385  | -3.1346546031 | -0.5699731423 |
| O    | 1.0902966132  | -3.4850863523 | -0.9444153615 |
| C    | 3.3891610333  | -3.9834742999 | -0.0910874824 |
| C    | 3.7832571056  | -4.9093886194 | -1.2261225249 |
| C    | 4.5547329800  | -0.4026766908 | -0.0643362330 |
| C    | 3.9108929028  | 0.8534875953  | -0.2313654651 |
| N    | 2.5507156845  | 1.0706477432  | -0.0739985758 |
| C    | 2.2875645403  | 2.4424291513  | -0.2093534373 |
| C    | 3.5519973126  | 3.0938154519  | -0.5340628307 |
| C    | 3.6848555422  | 4.5357708592  | -0.8299707629 |
| C    | 4.5423057608  | 2.1157703244  | -0.5469772001 |
| C    | 5.9826800252  | 2.2693130107  | -0.8479045023 |
| C    | 1.0581732867  | 3.0676604195  | -0.0489622447 |
| C    | -0.1769837561 | 2.3951352101  | 0.1069816281  |
| C    | -1.3999005504 | 3.0110906135  | 0.5987479600  |
| C    | -1.5093942776 | 4.3940934217  | 1.1103102055  |
| C    | -2.3755222896 | 2.0112011031  | 0.7440730910  |
| C    | -3.6726224308 | 2.2671698881  | 1.4103841243  |
| C    | -1.7466191825 | 0.6629664805  | 0.3433512727  |
| N    | -0.4364149884 | 1.0804510228  | -0.1233582640 |
| C    | -2.7297030887 | 0.8131004137  | -0.7600350813 |
| C    | -3.9623923893 | 0.1410417671  | -0.6814825529 |
| C    | -4.3841325365 | -0.8387502776 | 0.3279193586  |
| C    | -3.5482339737 | -1.2418920533 | 1.4796328063  |
| C    | -5.6151304045 | -1.3447556409 | -0.0610501001 |
| C    | -6.4191405870 | -2.3476573771 | 0.5772251150  |
| C    | -7.6034870660 | -2.7227502663 | 0.0629401442  |
| C    | -6.0052930583 | -0.6568489580 | -1.3425882821 |
| O    | -7.0049416466 | -0.7579877509 | -2.0461616056 |
| N    | -4.9335377463 | 0.2267840767  | -1.6573635047 |
| H    | 6.8765959853  | -4.8062478303 | 0.3528357158  |
| H    | 6.3374478759  | -2.2752955769 | 0.9097112440  |
| H    | 2.0828896242  | -1.0791358576 | -1.1044155367 |
| H    | 4.1269786676  | -4.3308892648 | -2.0944863876 |
| H    | 4.5961988754  | -5.5714556702 | -0.9010784924 |
| H    | 2.9201016545  | -5.5185459162 | -1.5190644405 |



---

|   |               |               |               |
|---|---------------|---------------|---------------|
| H | 5.6269683067  | -0.3872415257 | 0.1196676900  |
| H | 1.9658696964  | 0.4537819742  | 0.4804969316  |
| H | 4.7464399599  | 4.8170658694  | -0.8683616474 |
| H | 3.1865177377  | 5.1306633631  | -0.0490690729 |
| H | 6.2092786068  | 1.7982324483  | -1.8162079321 |
| H | 6.5856172142  | 1.7885748930  | -0.0615095720 |
| H | 6.2477961464  | 3.3352589857  | -0.8977715190 |
| H | 1.0459582668  | 4.1591451142  | -0.0135972469 |
| H | -2.4594429748 | 4.8329294043  | 0.7716808598  |
| H | -0.6774072317 | 5.0174906739  | 0.7508306726  |
| H | -4.2260873225 | 3.0586896169  | 0.8817302357  |
| H | -3.4700435905 | 2.6023584621  | 2.4391947152  |
| H | -4.2859609427 | 1.3599490065  | 1.4503122933  |
| H | 0.2026695795  | 0.4255889772  | -0.5444135395 |
| H | -2.5193816365 | 1.3965866941  | -1.6762469395 |
| H | -2.5465348853 | -0.8056985655 | 1.3713740629  |
| H | -3.4904090996 | -2.3402691435 | 1.5153253257  |
| H | -4.0116122526 | -0.8837826461 | 2.4134764471  |
| H | -6.0183028958 | -2.7863659886 | 1.4963367182  |
| H | -8.0049999917 | -2.2944396954 | -0.8445389779 |
| H | -8.2045167380 | -3.4818494261 | 0.5526481469  |
| H | -4.8970617144 | 0.8070446496  | -2.4803733966 |
| H | 5.3722567235  | -5.1949667775 | 1.2444451717  |
| H | 3.0975826341  | -4.5545371105 | 0.8245210044  |
| H | 6.7245582892  | -4.3790110607 | 2.0822062403  |
| H | 3.2218062584  | 4.7549878563  | -1.8036563949 |
| H | -1.4957624467 | 4.3808376250  | 2.2103027408  |

---

Cartesian coordinates of the Cl<sub>6</sub> structure

| Atom | x             | y             | z             |
|------|---------------|---------------|---------------|
| C    | 0.4075767142  | -3.0613227836 | -1.1804713527 |
| C    | -0.3058148894 | -1.7946349292 | -0.9033104115 |
| C    | -1.3814528519 | -1.3779595730 | -1.6164958807 |
| C    | -2.1391792546 | -0.1407483480 | -1.3177349858 |
| N    | -3.2274873481 | -0.0813376153 | -2.1490294930 |
| C    | -3.2724125812 | -1.1873642717 | -3.0355884009 |
| O    | -4.1705312959 | -1.3116766750 | -3.8540762098 |
| C    | -2.0452797771 | -2.0791220723 | -2.7763609958 |
| C    | -1.1989575855 | -2.0731986020 | -4.0327198276 |
| C    | -1.7605467091 | 0.8399103321  | -0.4062800669 |
| C    | -2.5721880775 | 1.9148467223  | -0.0066897550 |
| N    | -1.9719447376 | 3.0869878964  | 0.5012516833  |
| C    | -2.9337572925 | 4.0012122407  | 0.8169288332  |
| C    | -4.2320882882 | 3.3738228922  | 0.6193578705  |
| C    | -5.5230951746 | 4.0330422591  | 0.9074667354  |
| C    | -4.0133028768 | 2.0932529058  | 0.1212140620  |
| C    | -5.0599491545 | 1.0640129348  | -0.0717159301 |
| C    | -2.6409773035 | 5.3567232001  | 1.2365621532  |
| C    | -2.5376997033 | 5.6896455728  | 2.5700282699  |
| C    | -2.2484240411 | 6.9954895413  | 3.1444195968  |
| C    | -2.0118782947 | 8.2243252534  | 2.3614167734  |
| C    | -2.2554865519 | 6.8562621840  | 4.5402424577  |
| C    | -1.9148941204 | 7.9157906511  | 5.5172031488  |
| C    | -2.5412618912 | 5.4849299429  | 4.8376539136  |
| N    | -2.6552381515 | 4.7949506371  | 3.6376058896  |
| C    | -2.6298940801 | 4.7903028654  | 6.0938931746  |
| C    | -3.2308940998 | 5.3263253328  | 7.1989882925  |
| C    | -3.2894675497 | 4.7091195713  | 8.5503146679  |
| C    | -2.5946927555 | 3.4462445013  | 8.8789567984  |
| C    | -4.0449256514 | 5.5124296396  | 9.3641844916  |
| C    | -4.3784740647 | 5.3398587107  | 10.7609687282 |
| C    | -5.1398574956 | 6.2316286014  | 11.4070306112 |
| C    | -4.5144518487 | 6.6823612711  | 8.5375700397  |
| O    | -5.2341946846 | 7.6348001461  | 8.8414025695  |
| N    | -3.9612584476 | 6.5114425283  | 7.2551558021  |
| H    | 1.3602909719  | -2.8265842885 | -1.6770672294 |
| H    | 0.0844213755  | -1.1879036910 | -0.0723176815 |
| H    | -3.8831205210 | 0.6880241695  | -2.1834492217 |
| H    | -0.8372959434 | -1.0603440445 | -4.2537525882 |
| H    | -0.3331817174 | -2.7326580088 | -3.8968975574 |
| H    | -1.7935589625 | -2.4355894574 | -4.8786048762 |

---

|   |               |               |               |
|---|---------------|---------------|---------------|
| H | -0.7492889226 | 0.7895045957  | 0.0067974515  |
| H | -0.9777022089 | 3.2770830548  | 0.4982522074  |
| H | -6.0273204614 | 4.2759808113  | -0.0396274245 |
| H | -5.3572435597 | 4.9569154861  | 1.4746220456  |
| H | -5.8354993091 | 1.1990956033  | 0.6971712395  |
| H | -4.6445497969 | 0.0520144328  | 0.0264547810  |
| H | -5.5380728963 | 1.1836864157  | -1.0583682350 |
| H | -2.5811764222 | 6.1110688773  | 0.4635711929  |
| H | -1.5342355046 | 7.9864420871  | 1.3978760016  |
| H | -1.3591018787 | 8.9069273771  | 2.9260160877  |
| H | -2.7789908183 | 8.5834242635  | 5.6744867051  |
| H | -1.0805664823 | 8.5183234281  | 5.1219273455  |
| H | -1.6130149370 | 7.4759107641  | 6.4765751033  |
| H | -2.9536130310 | 3.8348089157  | 3.5572745170  |
| H | -2.1946557132 | 3.7901832477  | 6.1441018717  |
| H | -1.5110038633 | 3.5713841820  | 8.7326869191  |
| H | -2.9589995165 | 2.6378008770  | 8.2246563854  |
| H | -2.7848550044 | 3.1703733557  | 9.9252182353  |
| H | -3.9742087132 | 4.4472935601  | 11.2547171027 |
| H | -5.5350009721 | 7.1110421561  | 10.9208238284 |
| H | -5.3879740758 | 6.0970093398  | 12.4549874626 |
| H | -4.1624456302 | 7.1003184254  | 6.4642272929  |
| H | -0.1769870941 | -3.7317781192 | -1.8243439525 |
| H | -2.3894326257 | -3.1032761896 | -2.5064316873 |
| H | 0.6214940426  | -3.5740694850 | -0.2330202072 |
| H | -6.1671043826 | 3.3547555639  | 1.4892296703  |
| H | -2.9734121861 | 8.7290190625  | 2.1707239287  |

---
